# Supplementary material for: Teadenol B as a Component of Microorganism-Fermented Tea Extract Inhibited Breast Cancers by Promoting Autophagy
Source: MDPI journal article supplement (doi:10.3390/molecules29040872), 2024-02-16
Supplement: s1 [file s1]

Table S1. <sup>1</sup>H, <sup>13</sup>C NMR data for teadenol B (solvent: deuterated dimethyl sulfoxide (DMSO-d<sub>6</sub>)).

| position | δ <sub>H</sub> (mult., J <sub>HH</sub> Hz) (500 MHz) | δ <sub>C</sub> (mult.) (125 MHz) | ROESY<br>H↔H | HMBC<br>H→C     |
|----------|------------------------------------------------------|----------------------------------|--------------|-----------------|
| 2        | 4.00 (1H, <i>d</i> , J=13.5)                         | 71.10 ( <i>d</i> )               | 4-H          | C-3,4,14,15     |
| 3        | 4.42 (1H, <i>m</i> )                                 | 72.77 ( <i>d</i> )               | 4-H          | C-2,C-14        |
| 4        | 2.56 (1H, <i>m</i> , J=8.0, J=19.4)                  | 25.70 ( <i>d</i> )               |              | C-2,3,5,9,10    |
|          | 3.04 (1H, <i>m</i> , J=12.8, J=19.4)                 |                                  |              | C-2,3,5,9,10    |
| 5        |                                                      | 156.38 ( <i>s</i> )              |              |                 |
| 6        | 5.96 (1H, <i>d</i> , J=2.6)                          | 95.96 ( <i>d</i> )               | 5-OH         | C-5,7,8,10      |
| 7        |                                                      | 156.96 ( <i>s</i> )              |              |                 |
| 8        | 5.79 (1H, <i>d</i> , J=2.6)                          | 94.18 ( <i>d</i> )               | 7-OH         | C-6,7,9,10      |
| 9        |                                                      | 154.28 ( <i>s</i> )              |              |                 |
| 10       |                                                      | 98.04 ( <i>s</i> )               |              |                 |
| 12       |                                                      | 144.00 ( <i>s</i> )              |              |                 |
| 13       | 6.57 (1H, <i>s</i> )                                 | 111.49 ( <i>d</i> )              | 15-H         | C-2,12,14,15,16 |
| 14       |                                                      | 136.71 ( <i>s</i> )              |              |                 |
| 15       | 5.39 (2H <i>br</i> , <i>s</i> )                      | 112.55 ( <i>t</i> )              | 13-H         | C-2,C-13,C-14   |
| 16       |                                                      | 163.05 ( <i>s</i> ) ( <i>s</i> ) |              |                 |
| 5-OH     | 9.46 (1H, <i>br</i> )                                |                                  | 6-H          | C-5,6,10        |
| 7-OH     | 9.14 (1H, <i>br</i> )                                |                                  | 8-H          | C-6,7,8         |

AUTOPHAGY - ANIMAL

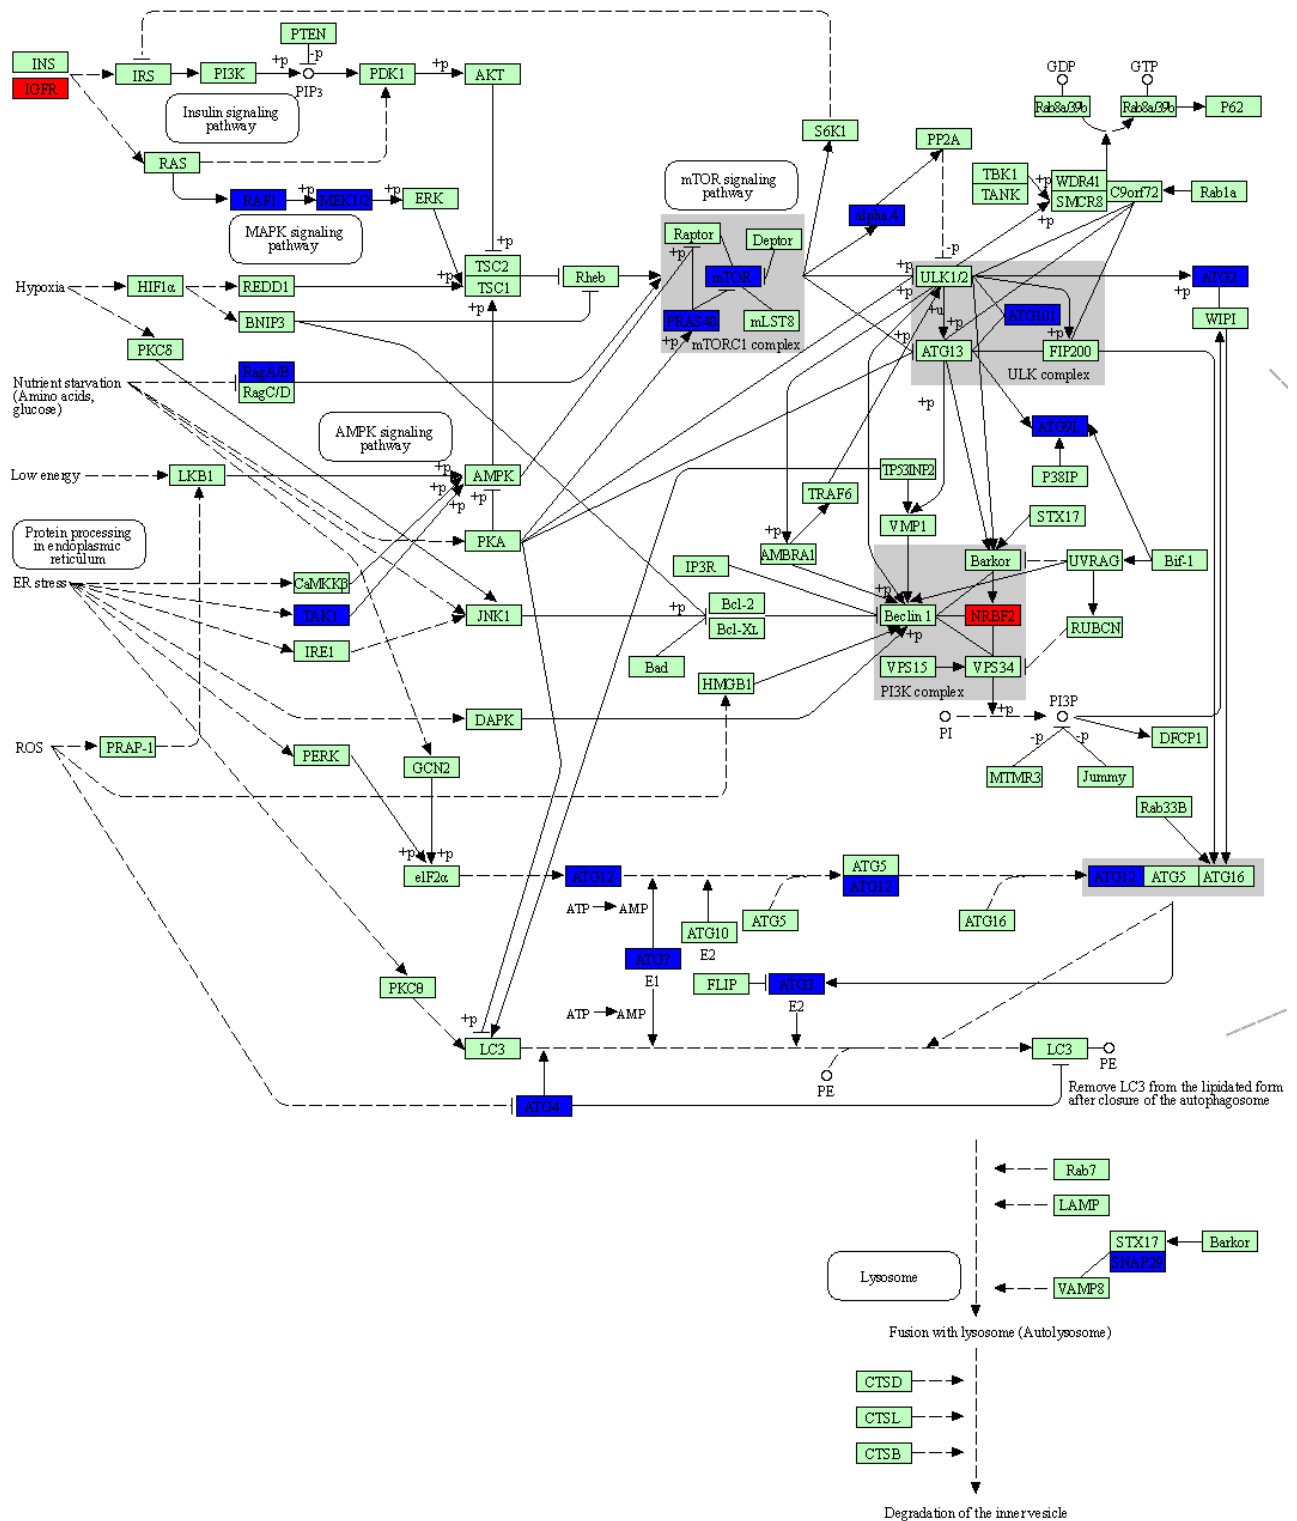

Figure S1. Differentially expressed proteins related to autophagy pathways in MDA-MB-231 cells.

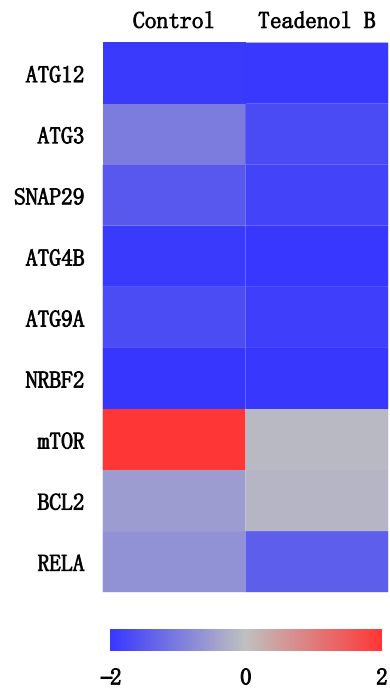

Figure S2. Heat map analysis of differentially expressed proteins related to autophagy pathways in MDA-MB-231 cells.

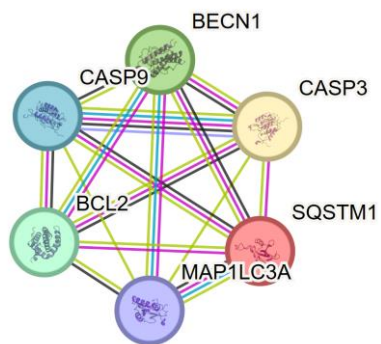

Figure S3. Interaction analysis of key proteins using STRING database.
